# Supplementary material
Source: PubMed Central journal article supplement (PMC4344142)
Supplement: rspb20142232supp1.pdf [file rspb20142232supp1.pdf]

Electronic supplementary material

**Table S1.** Mean flight metabolic rate and thoracic temperature of sampled orchid bee species ranked by mean body mass (g) ( $\pm$ SE) (n=188).

| Genus            | Species               | n  | Body mass (g)          | FMR (ml CO <sub>2</sub> h <sup>-1</sup> g <sup>-1</sup> ) | Thorax temperature (°C) |
|------------------|-----------------------|----|------------------------|-----------------------------------------------------------|-------------------------|
| <i>Euglossa</i>  | <i>sapphirina</i>     | 12 | 0.0597 ( $\pm$ 0.0018) | 79.80 ( $\pm$ 2.19)                                       | 36.53 ( $\pm$ 0.33)     |
| <i>Euglossa</i>  | <i>crassipunctata</i> | 14 | 0.0764 ( $\pm$ 0.0020) | 74.05 ( $\pm$ 2.11)                                       | 37.12 ( $\pm$ 0.19)     |
| <i>Euglossa</i>  | <i>bursigera</i>      | 12 | 0.0813 ( $\pm$ 0.0016) | 89.99 ( $\pm$ 2.95)                                       | 38.83 ( $\pm$ 0.39)     |
| <i>Euglossa</i>  | <i>dissimula</i>      | 10 | 0.0919 ( $\pm$ 0.0029) | 84.58 ( $\pm$ 4.66)                                       | 37.83 ( $\pm$ 0.57)     |
| <i>Euglossa</i>  | <i>deceptrix</i>      | 6  | 0.0953 ( $\pm$ 0.0046) | --                                                        | --                      |
| <i>Euglossa</i>  | <i>mixta</i>          | 10 | 0.1083 ( $\pm$ 0.0035) | 90.84 ( $\pm$ 3.46)                                       | 38.89 ( $\pm$ 0.27)     |
| <i>Euglossa</i>  | <i>tridentata</i>     | 12 | 0.1206 ( $\pm$ 0.0037) | 81.12 ( $\pm$ 1.73)                                       | 38.41 ( $\pm$ 0.23)     |
| <i>Euglossa</i>  | <i>cognata</i>        | 13 | 0.1625 ( $\pm$ 0.0040) | 75.27 ( $\pm$ 2.26)                                       | 37.62 ( $\pm$ 0.46)     |
| <i>Euglossa</i>  | <i>asarophora</i>     | 5  | 0.1624 ( $\pm$ 0.0082) | --                                                        | --                      |
| <i>Euglossa</i>  | <i>imperialis</i>     | 11 | 0.1689 ( $\pm$ 0.0058) | 67.20 ( $\pm$ 2.78)                                       | 38.43 ( $\pm$ 0.33)     |
| <i>Eufriesea</i> | <i>rufocauda</i>      | 5  | 0.2117 ( $\pm$ 0.0143) | --                                                        | --                      |
| <i>Eufriesea</i> | <i>anisochlora</i>    | 9  | 0.2185 ( $\pm$ 0.0071) | --                                                        | --                      |
| <i>Eufriesea</i> | <i>chrysopyga</i>     | 7  | 0.2744 ( $\pm$ 0.0072) | --                                                        | --                      |
| <i>Eulaema</i>   | <i>polychroma</i>     | 2  | 0.3326 ( $\pm$ 0.0219) | 67.01 ( $\pm$ 2.40)                                       | 38.00 ( $\pm$ 0.50)     |
| <i>Eufriesea</i> | <i>pulchra</i>        | 10 | 0.3895 ( $\pm$ 0.0147) | 88.64 ( $\pm$ 2.32)                                       | 38.22 ( $\pm$ 0.27)     |
| <i>Eulaema</i>   | <i>nigrita</i>        | 10 | 0.4147 ( $\pm$ 0.0183) | 63.57 ( $\pm$ 1.22)                                       | 38.30 ( $\pm$ 0.60)     |
| <i>Eufriesea</i> | <i>dressleri</i>      | 3  | 0.4507 ( $\pm$ 0.0207) | --                                                        | --                      |
| <i>Eufriesea</i> | <i>schmidtiana</i>    | 4  | 0.5024 ( $\pm$ 0.0187) | --                                                        | --                      |
| <i>Eulaema</i>   | <i>cingulata</i> *    | 11 | 0.5261 ( $\pm$ 0.0189) | 59.98 ( $\pm$ 2.08)                                       | 36.77 ( $\pm$ 0.55)     |
| <i>Exaerete</i>  | <i>frontalis</i>      | 7  | 0.7097 ( $\pm$ 0.0420) | 36.02 ( $\pm$ 1.42)                                       | 36.18 ( $\pm$ 0.61)     |
| <i>Eulaema</i>   | <i>bombiformis</i>    | 4  | 0.9228 ( $\pm$ 0.0356) | 56.77 ( $\pm$ 5.84)                                       | 38.18 ( $\pm$ 0.70)     |
| <i>Eulaema</i>   | <i>meriana</i>        | 11 | 0.9394 ( $\pm$ 0.0252) | 51.53 ( $\pm$ 1.31)                                       | 37.62 $\pm$ 0.52)       |

\*Note that *Eulaema cingulata* has been recently recognized as *Eulaema marcii* in Central America. We maintained the *E. cingulata* species name in our data set to relate to published data using this name and referring to this Central American species.



**Table S2.** Mean ( $\pm$ SE) % saturated fatty acid in the phospholipid fraction of 22 species of orchid bees.

| Genus            | Species               | C14:0              | C16:0               | C18:0                | C20:0               | C22:0              | $\Sigma$ SFAs       |
|------------------|-----------------------|--------------------|---------------------|----------------------|---------------------|--------------------|---------------------|
| <i>Euglossa</i>  | <i>sapphirina</i>     | 0.23 ( $\pm$ 0.12) | 7.77 ( $\pm$ 0.47)  | 15.04 ( $\pm$ 0.60)  | 0.25 ( $\pm$ 0.088) | 0.00 ( $\pm$ 0.00) | 23.06 ( $\pm$ 0.97) |
| <i>Euglossa</i>  | <i>crassipunctata</i> | 0.08 ( $\pm$ 0.03) | 6.75 ( $\pm$ 0.31)  | 14.62 ( $\pm$ 0.73)  | 0.45 ( $\pm$ 0.11)  | 0.08 ( $\pm$ 0.08) | 21.91 ( $\pm$ 0.87) |
| <i>Euglossa</i>  | <i>bursigera</i>      | 0.13 ( $\pm$ 0.07) | 7.30 ( $\pm$ 0.60)  | 13.64 ( $\pm$ 0.68)  | 0.52 ( $\pm$ 0.1)   | 0.05 ( $\pm$ 0.05) | 21.51 ( $\pm$ 1.07) |
| <i>Euglossa</i>  | <i>dissimula</i>      | 0.03 ( $\pm$ 0.03) | 6.38 ( $\pm$ 0.43)  | 12.42 ( $\pm$ 0.75)  | 0.58 ( $\pm$ 0.11)  | 0.00 ( $\pm$ 0.00) | 19.38 ( $\pm$ 1.00) |
| <i>Euglossa</i>  | <i>deceptrix</i>      | 0.22 ( $\pm$ 0.20) | 8.33 ( $\pm$ 0.43)  | 14.97 ( $\pm$ 1.24)  | 0.45 ( $\pm$ 0.27)  | 0.00 ( $\pm$ 0.00) | 23.75 ( $\pm$ 1.49) |
| <i>Euglossa</i>  | <i>mixta</i>          | 0.04 ( $\pm$ 0.03) | 6.74 ( $\pm$ 0.35)  | 12.63 ( $\pm$ 0.51)  | 0.45 ( $\pm$ 0.11)  | 0.00 ( $\pm$ 0.00) | 19.82 ( $\pm$ 0.76) |
| <i>Euglossa</i>  | <i>tridentata</i>     | 0.12 ( $\pm$ 0.05) | 6.95 ( $\pm$ 0.21)  | 12.17 ( $\pm$ 0.52)  | 0.59 ( $\pm$ 0.09)  | 0.00 ( $\pm$ 0.00) | 19.71 ( $\pm$ 0.53) |
| <i>Euglossa</i>  | <i>cognata</i>        | 0.00 ( $\pm$ 0.06) | 7.38 ( $\pm$ 0.67)  | 12.90 ( $\pm$ 0.69)  | 1.70 ( $\pm$ 0.63)  | 0.00 ( $\pm$ 0.00) | 21.98 ( $\pm$ 1.01) |
| <i>Euglossa</i>  | <i>asarophora</i>     | 0.23 ( $\pm$ 0.00) | 7.37 ( $\pm$ 0.50)  | 13.56 ( $\pm$ 0.84)  | 0.62 ( $\pm$ 0.09)  | 0.00 ( $\pm$ 0.00) | 21.55 ( $\pm$ 1.17) |
| <i>Euglossa</i>  | <i>imperialis</i>     | 0.24 ( $\pm$ 0.10) | 8.62 ( $\pm$ 0.56)  | 11.91 ( $\pm$ 1.03)  | 0.56 ( $\pm$ 0.13)  | 0.00 ( $\pm$ 0.00) | 21.09 ( $\pm$ 1.22) |
| <i>Eufriesea</i> | <i>rufocauda</i>      | 0.05 ( $\pm$ 0.04) | 7.35 ( $\pm$ 0.50)  | 16.46 ( $\pm$ 2.15)  | 0.96 ( $\pm$ 0.37)  | 0.00 ( $\pm$ 0.00) | 24.76 ( $\pm$ 2.40) |
| <i>Eufriesea</i> | <i>anisochlora</i>    | 0.36 ( $\pm$ 0.05) | 6.43 ( $\pm$ 0.24)  | 14.31 ( $\pm$ 0.2)   | 0.87 ( $\pm$ 0.23)  | 0.00 ( $\pm$ 0.00) | 21.62 ( $\pm$ 0.32) |
| <i>Eufriesea</i> | <i>chrysopyga</i>     | 0.14 ( $\pm$ 0.07) | 6.54 ( $\pm$ 0.61)  | 16.84 ( $\pm$ 1.37)  | 1.05 ( $\pm$ 0.26)  | 0.00 ( $\pm$ 0.00) | 24.42 ( $\pm$ 1.67) |
| <i>Eulaema</i>   | <i>polychroma</i>     | 0.62 ( $\pm$ 0.11) | 5.80 ( $\pm$ 0.10)  | 10.00 ( $\pm$ 0.15)  | 0.13 ( $\pm$ 0.09)  | 0.00 ( $\pm$ 0.00) | 15.92 ( $\pm$ 0.14) |
| <i>Eufriesea</i> | <i>pulchra</i>        | 0.18 ( $\pm$ 0.05) | 4.38 ( $\pm$ 0.14)  | 12.94 ( $\pm$ 0.42)  | 0.39 ( $\pm$ 0.09)  | 0.00 ( $\pm$ 0.00) | 17.71 ( $\pm$ 0.52) |
| <i>Eulaema</i>   | <i>nigrita</i>        | 0.31 ( $\pm$ 0.10) | 7.59 ( $\pm$ 0.79)  | 11.53 ( $\pm$ 0.76)  | 0.18 ( $\pm$ 0.06)  | 0.00 ( $\pm$ 0.00) | 19.30 ( $\pm$ 1.53) |
| <i>Eufriesea</i> | <i>dressleri</i>      | 0.00 ( $\pm$ 0.00) | 13.01 ( $\pm$ 1.73) | 18.17 ( $\pm$ 1.94)  | 0.00 ( $\pm$ 0.00)  | 0.00 ( $\pm$ 0.00) | 31.18 ( $\pm$ 3.44) |
| <i>Eufriesea</i> | <i>schmidtiana</i>    | 0.13 ( $\pm$ 0.07) | 6.88 ( $\pm$ 0.37)  | 13.55 ( $\pm$ 0.63)  | 0.53 ( $\pm$ 0.28)  | 0.45 ( $\pm$ 0.39) | 21.46 ( $\pm$ 0.35) |
| <i>Eulaema</i>   | <i>cingulata</i>      | 0.57 ( $\pm$ 0.10) | 6.34 ( $\pm$ 0.16)  | 8.86 ( $\pm$ 0.33)   | 0.26 ( $\pm$ 0.07)  | 0.00 ( $\pm$ 0.00) | 15.46 ( $\pm$ 0.38) |
| <i>Exaerete</i>  | <i>frontalis</i>      | 0.02 ( $\pm$ 0.02) | 8.85 ( $\pm$ 0.65)  | 9.75 ( $\pm$ 1.23)   | 0.06 ( $\pm$ 0.05)  | 0.35 ( $\pm$ 0.32) | 19.00 ( $\pm$ 1.59) |
| <i>Eulaema</i>   | <i>bombiformis</i>    | 0.44 ( $\pm$ 0.25) | 6.08 ( $\pm$ 0.32)  | 9.73 ( $\pm$ 0.46)   | 0.20 ( $\pm$ 0.18)  | 0.00 ( $\pm$ 0.00) | 16.02 ( $\pm$ 0.83) |
| <i>Eulaema</i>   | <i>meriana</i>        | 0.45 ( $\pm$ 0.08) | 6.03 ( $\pm$ 0.20)  | 10.442 ( $\pm$ 0.55) | 0.54 ( $\pm$ 0.12)  | 0.00 ( $\pm$ 0.00) | 17.01 ( $\pm$ 0.60) |

**Table S3.** Mean ( $\pm$ SE) % unsaturated fatty acid in the phospholipid fraction of 22 species of orchid bees.

| Genus            | Species               | C16:1 n-7            | C18:1 n-9           | C18:2 n-6           | C18:3 n-3           | C20:5               | C22:1              | $\Sigma$ PUFAs      |
|------------------|-----------------------|----------------------|---------------------|---------------------|---------------------|---------------------|--------------------|---------------------|
| <i>Euglossa</i>  | <i>sapphirina</i>     | 0.47 ( $\pm$ 0.11)   | 43.45 ( $\pm$ 1.41) | 6.16 ( $\pm$ 0.64)  | 25.66 ( $\pm$ 1.12) | 0.16 ( $\pm$ 0.09)  | 0.82 ( $\pm$ 0.46) | 31.98 ( $\pm$ 1.28) |
| <i>Euglossa</i>  | <i>crassipunctata</i> | 0.16 ( $\pm$ 0.04)   | 47.32 ( $\pm$ 2.35) | 6.43 ( $\pm$ 1.07)  | 23.32 ( $\pm$ 2.25) | 0.39 ( $\pm$ 0.10)  | 0.41 ( $\pm$ 0.19) | 30.13 ( $\pm$ 2.42) |
| <i>Euglossa</i>  | <i>bursigera</i>      | 2.42 ( $\pm$ 0.24)   | 46.91 ( $\pm$ 1.22) | 8.64 ( $\pm$ 1.53)  | 19.55 ( $\pm$ 1.75) | 0.46 ( $\pm$ 0.13)  | 0.38 ( $\pm$ 0.14) | 28.65 ( $\pm$ 1.72) |
| <i>Euglossa</i>  | <i>dissimula</i>      | 3.10 ( $\pm$ 0.76)   | 51.28 ( $\pm$ 2.12) | 10.30 ( $\pm$ 1.73) | 15.15 ( $\pm$ 1.18) | 0.44 ( $\pm$ 0.12)  | 0.33 ( $\pm$ 0.12) | 25.89 ( $\pm$ 2.34) |
| <i>Euglossa</i>  | <i>deceptrix</i>      | 0.27 ( $\pm$ 0.25)   | 50.25 ( $\pm$ 2.10) | 12.81 ( $\pm$ 3.08) | 11.46 ( $\pm$ 1.21) | 0.41 ( $\pm$ 0.24)  | 0.84 ( $\pm$ 0.35) | 24.67 ( $\pm$ 2.30) |
| <i>Euglossa</i>  | <i>mixta</i>          | 0.04 ( $\pm$ 0.03)   | 49.07 ( $\pm$ 1.61) | 10.13 ( $\pm$ 1.33) | 20.01 ( $\pm$ 1.80) | 0.37 ( $\pm$ 0.12)  | 0.51 ( $\pm$ 0.18) | 30.51 ( $\pm$ 1.86) |
| <i>Euglossa</i>  | <i>tridentata</i>     | 0.08 ( $\pm$ 0.05)   | 52.14 ( $\pm$ 1.83) | 12.76 ( $\pm$ 1.47) | 14.33 ( $\pm$ 1.34) | 0.59 ( $\pm$ 0.10)  | 0.27 ( $\pm$ 0.07) | 27.68 ( $\pm$ 1.47) |
| <i>Euglossa</i>  | <i>cognata</i>        | 2.10 ( $\pm$ 0.05)   | 53.26 ( $\pm$ 1.52) | 13.04 ( $\pm$ 1.70) | 7.97 ( $\pm$ 0.85)  | 1.43 ( $\pm$ 0.54)  | 0.24 ( $\pm$ 0.13) | 22.44 ( $\pm$ 1.98) |
| <i>Euglossa</i>  | <i>asarophora</i>     | 0.18 ( $\pm$ 0.55)   | 46.12 ( $\pm$ 2.29) | 13.59 ( $\pm$ 0.78) | 17.29 ( $\pm$ 0.88) | 0.59 ( $\pm$ 0.12)  | 0.45 ( $\pm$ 0.17) | 31.46 ( $\pm$ 1.83) |
| <i>Euglossa</i>  | <i>imperialis</i>     | 0.23 ( $\pm$ 0.07)   | 45.81 ( $\pm$ 2.12) | 19.04 ( $\pm$ 1.73) | 12.61 ( $\pm$ 1.09) | 0.45 ( $\pm$ 0.15)  | 0.45 ( $\pm$ 0.23) | 32.11 ( $\pm$ 1.91) |
| <i>Eufriesea</i> | <i>rufocauda</i>      | 0.04 ( $\pm$ 0.04)   | 46.10 ( $\pm$ 2.43) | 17.31 ( $\pm$ 1.27) | 10.35 ( $\pm$ 1.16) | 1.22 ( $\pm$ 0.71)  | 0.16 ( $\pm$ 0.15) | 28.88 ( $\pm$ 1.53) |
| <i>Eufriesea</i> | <i>anisochlora</i>    | 0.16 ( $\pm$ 0.04)   | 48.25 ( $\pm$ 0.71) | 19.99 ( $\pm$ 0.55) | 8.44 ( $\pm$ 0.33)  | 1.153 ( $\pm$ 0.27) | 0.04 ( $\pm$ 0.02) | 29.58 ( $\pm$ 0.79) |
| <i>Eufriesea</i> | <i>chrysopyga</i>     | 0.18 ( $\pm$ 0.08)   | 48.14 ( $\pm$ 1.17) | 14.12 ( $\pm$ 1.25) | 11.02 ( $\pm$ 1.11) | 1.74 ( $\pm$ 0.44)  | 0.24 ( $\pm$ 0.20) | 26.88 ( $\pm$ 2.23) |
| <i>Eulaema</i>   | <i>polychroma</i>     | 0.062 ( $\pm$ 0.043) | 54.69 ( $\pm$ 0.83) | 14.35 ( $\pm$ 3.43) | 14.35 ( $\pm$ 2.68) | 0.00 ( $\pm$ 0.00)  | 0.00 ( $\pm$ 0.00) | 28.70 ( $\pm$ 0.75) |
| <i>Eufriesea</i> | <i>pulchra</i>        | 0.058 ( $\pm$ 0.033) | 54.00 ( $\pm$ 1.11) | 8.76 ( $\pm$ 1.51)  | 18.70 ( $\pm$ 1.47) | 0.39 ( $\pm$ 0.13)  | 0.21 ( $\pm$ 0.11) | 27.84 ( $\pm$ 0.99) |
| <i>Eulaema</i>   | <i>nigrita</i>        | 0.04 ( $\pm$ 0.03)   | 53.13 ( $\pm$ 1.11) | 14.35 ( $\pm$ 1.90) | 12.61 ( $\pm$ 1.03) | 0.24 ( $\pm$ 0.10)  | 0.02 ( $\pm$ 0.01) | 27.20 ( $\pm$ 2.20) |
| <i>Eufriesea</i> | <i>dressleri</i>      | 0.00 ( $\pm$ 0.00)   | 51.89 ( $\pm$ 2.12) | 11.54 ( $\pm$ 1.98) | 5.39 ( $\pm$ 0.44)  | 0.00 ( $\pm$ 0.00)  | 0.00 ( $\pm$ 0.00) | 16.93 ( $\pm$ 2.07) |
| <i>Eufriesea</i> | <i>schmidtiana</i>    | 0.057 ( $\pm$ 0.028) | 59.62 ( $\pm$ 2.46) | 5.99 ( $\pm$ 3.65)  | 12.46 ( $\pm$ 1.79) | 0.15 ( $\pm$ 0.11)  | 0.02 ( $\pm$ 0.02) | 18.69 ( $\pm$ 1.75) |
| <i>Eulaema</i>   | <i>cingulata</i>      | 0.015 ( $\pm$ 0.010) | 54.81 ( $\pm$ 1.87) | 16.68 ( $\pm$ 1.89) | 12.10 ( $\pm$ 1.20) | 0.30 ( $\pm$ 0.09)  | 0.05 ( $\pm$ 0.03) | 29.09 ( $\pm$ 1.70) |
| <i>Exaerete</i>  | <i>frontalis</i>      | 0.26 ( $\pm$ 0.12)   | 52.59 ( $\pm$ 2.10) | 16.18 ( $\pm$ 1.28) | 11.91 ( $\pm$ 1.49) | 0.03 ( $\pm$ 0.03)  | 0.00 ( $\pm$ 0.00) | 28.12 ( $\pm$ 1.79) |
| <i>Eulaema</i>   | <i>bombiformis</i>    | 0.08 ( $\pm$ 0.07)   | 59.77 ( $\pm$ 0.65) | 8.62 ( $\pm$ 1.46)  | 14.92 ( $\pm$ 1.06) | 0.15 ( $\pm$ 0.13)  | 0.00 ( $\pm$ 0.00) | 23.69 ( $\pm$ 1.68) |
| <i>Eulaema</i>   | <i>meriana</i>        | 0.04 ( $\pm$ 0.03)   | 56.05 ( $\pm$ 1.29) | 13.44 ( $\pm$ 1.85) | 12.54 ( $\pm$ 1.09) | 0.40 ( $\pm$ 0.13)  | 0.06 ( $\pm$ 0.03) | 26.38 ( $\pm$ 1.09) |

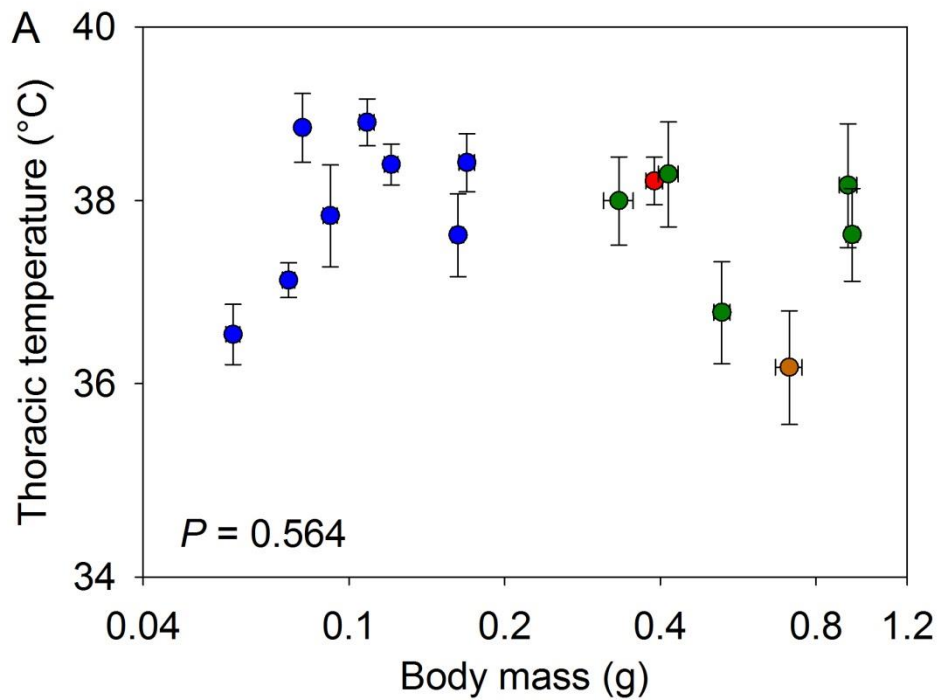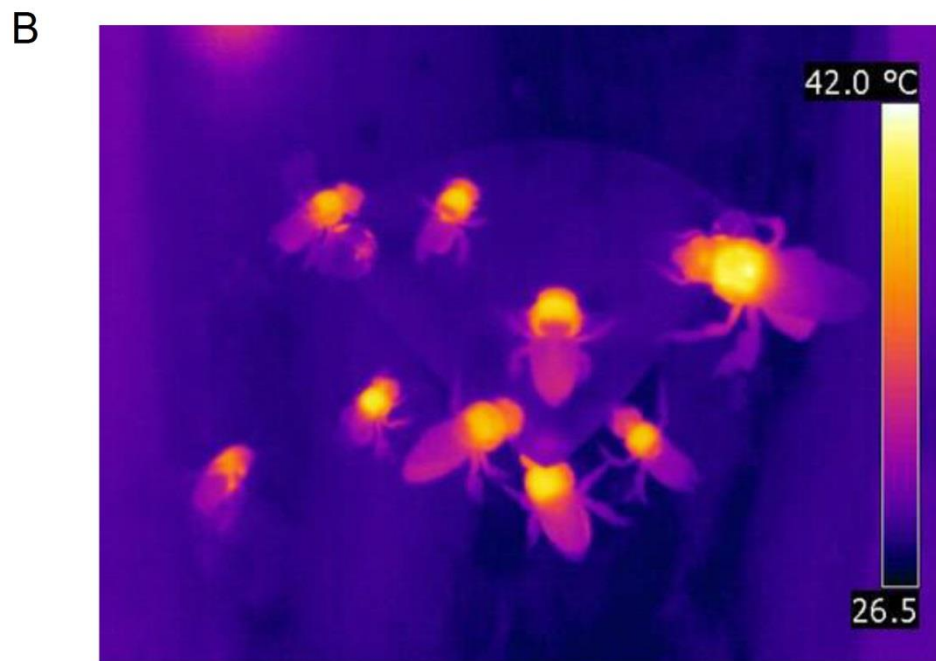

**Figure S1.** (A) Relationship between body mass and thoracic temperature in 15 orchid bee species. Values are means ( $\pm$ SE) and colors represent the four genera sampled (blue: *Euglossa*, red: *Eufriesea*, green: *Eulaema*, orange: *Exaerete*). (B) Thermogram showing orchid bee species of various sizes collecting chemical baits on a paper attached to a tree.
